# Supplementary material
Source: PubMed Central journal article supplement (PMC4478165)
Supplement: NIHMS658049-supplement-Supp_FigureS1.pdf [file NIHMS658049-supplement-Supp_FigureS1.pdf]

Supplementary Figure 1. Kaplan-Meier survival curves stratified by CCL22 Quartiles in all glioma cases (A), GBM cases (B), and Non-GBM cases (C), UCSF Adult Glioma Study 1997-2012

# A. All Cases

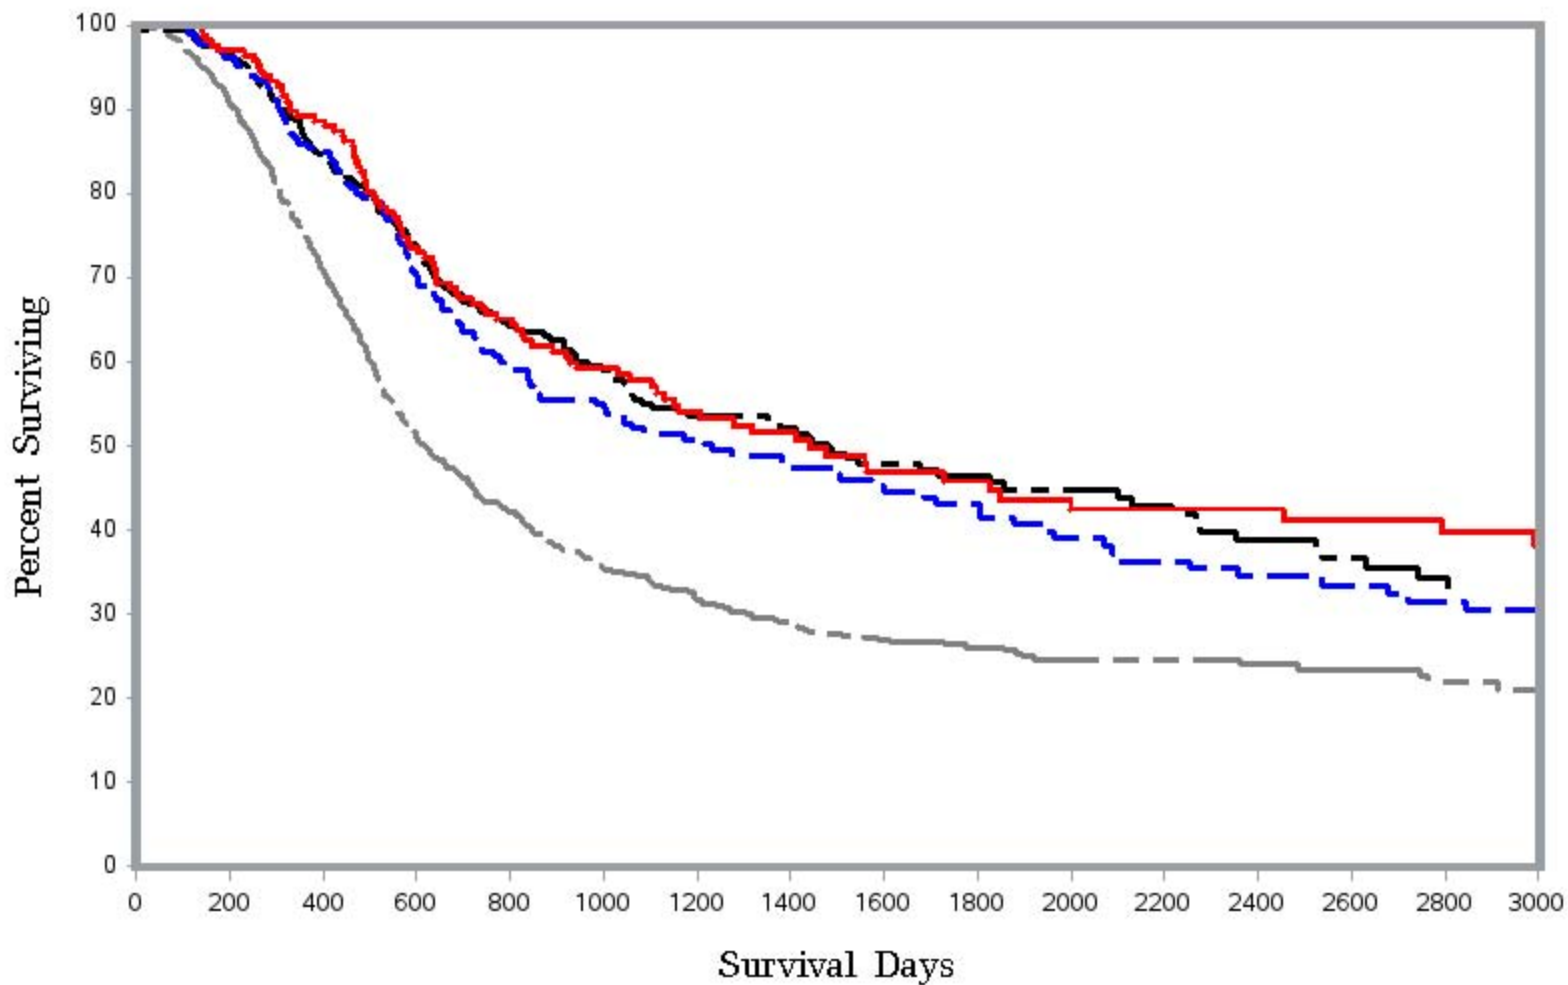

PLOT    -- CCL22 0.03–105ng/mL(Q1)      - - CCL22 105–140ng/mL (Q2)  
          - - CCL22 140–187ng/mL (Q3)      - - CCL22 187–15.8ng/mL (Q4)

## B. GBM Cases

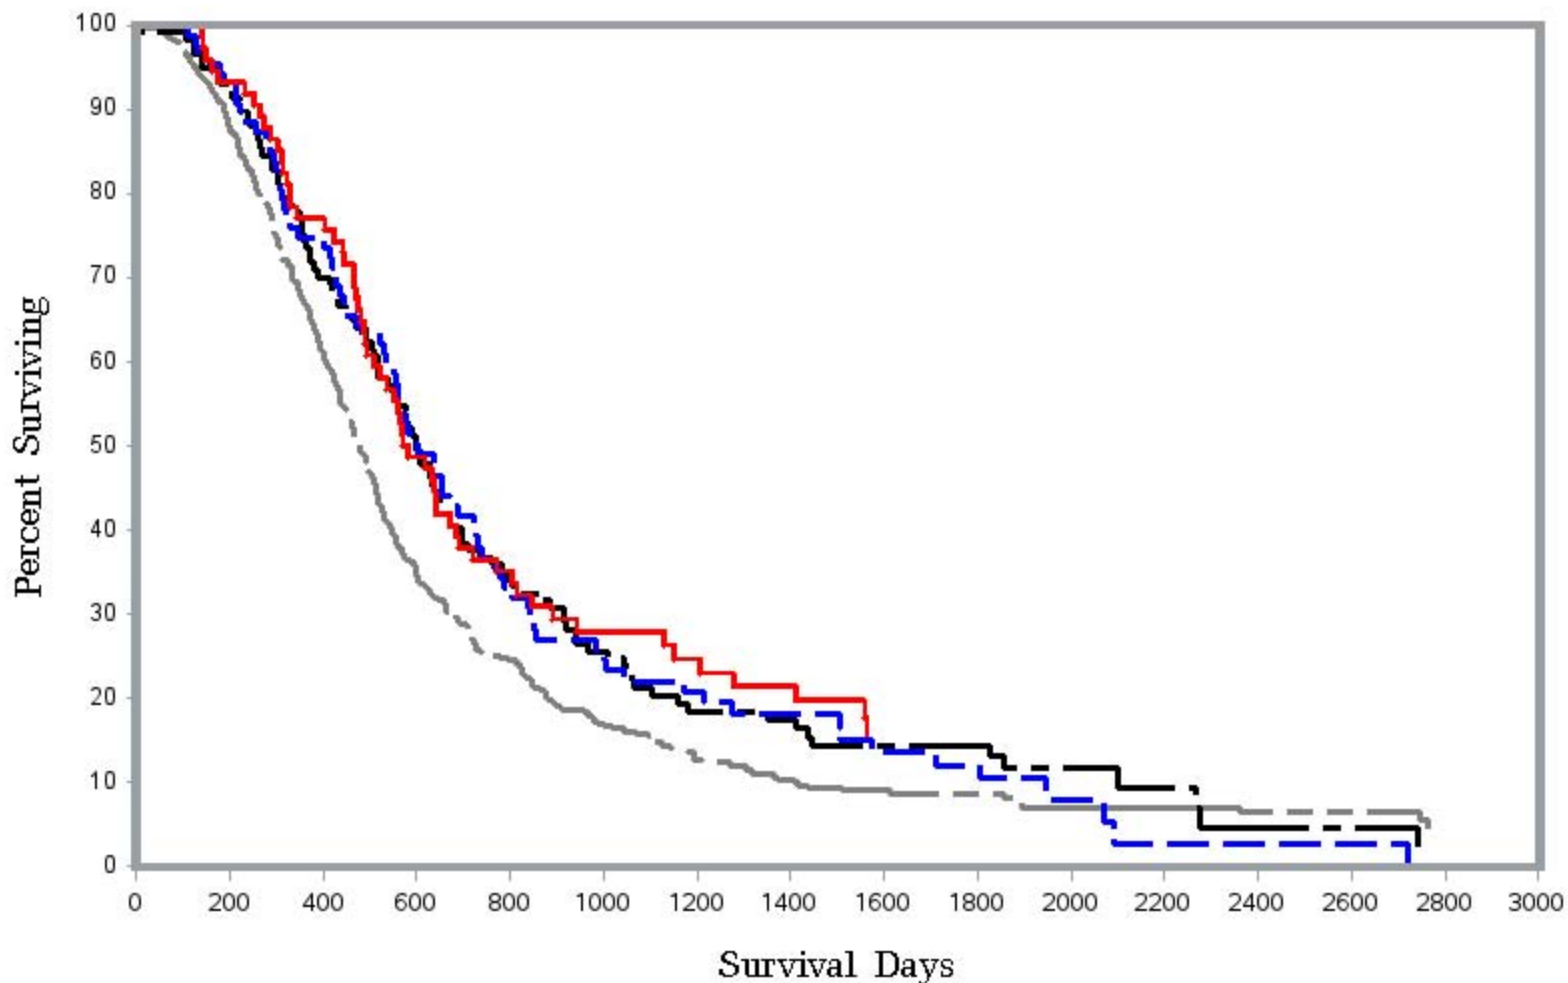

PLOT    -- CCL22 0.03–105ng/mL(Q1)      - - CCL22 105–140ng/mL (Q2)  
 - - CCL22 140–187ng/mL (Q3)      - - CCL22 187–15,130ng/mL (Q4)

### C. Non-GBM Cases

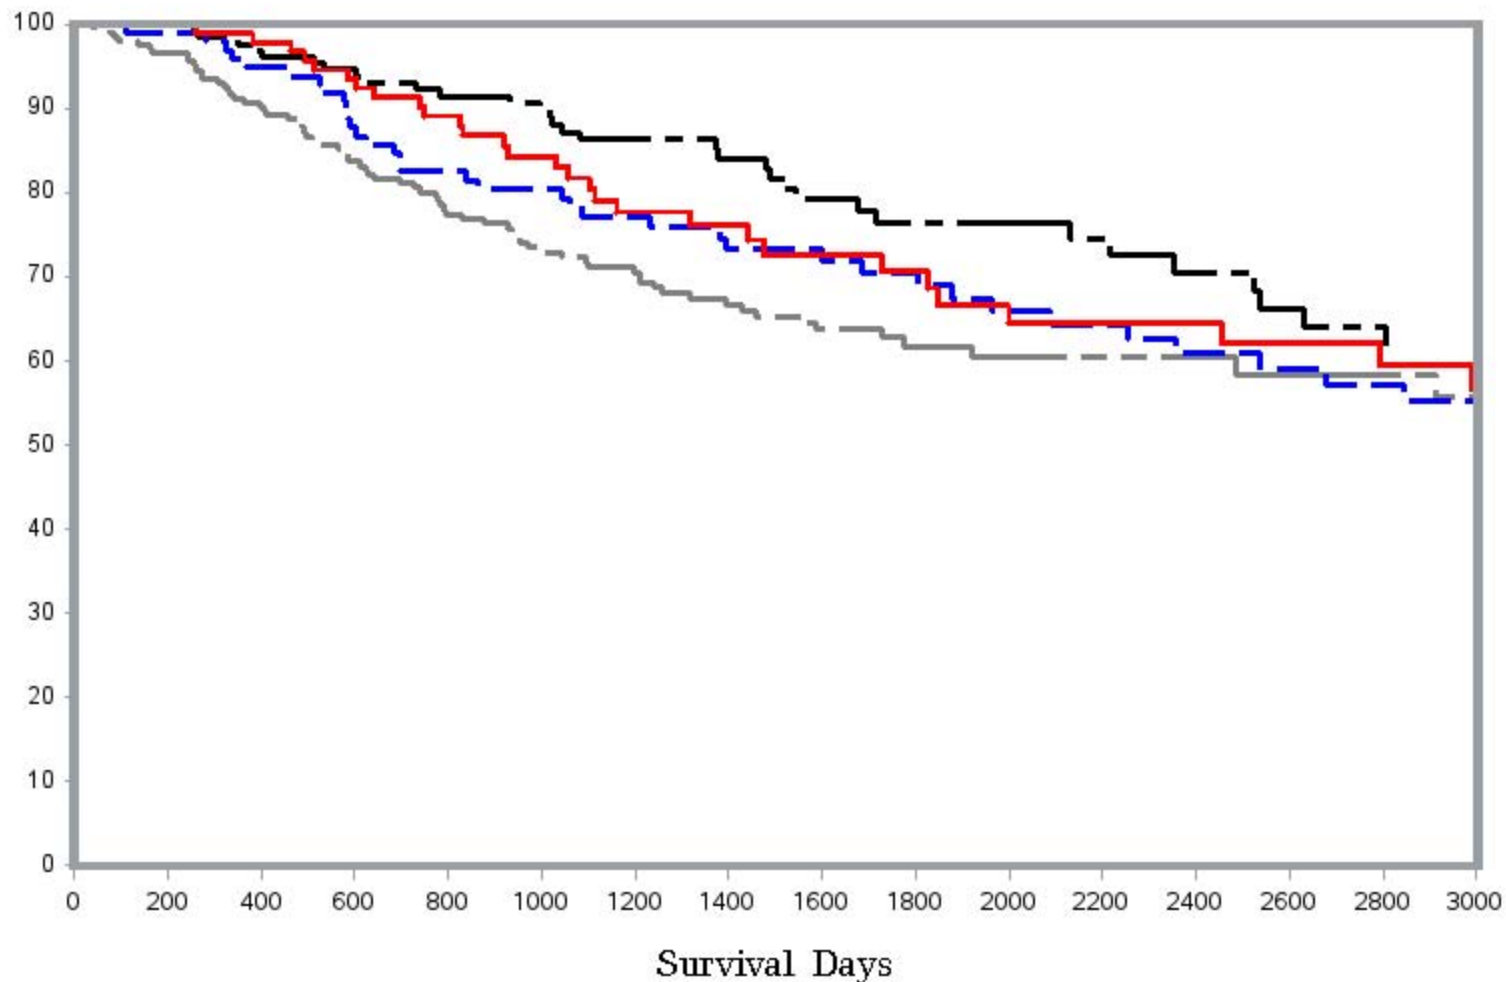

PLOT    -- CCL22 0.03-105ng/mL(Q1)      - - CCL22 105-140ng/mL (Q2)  
          - - CCL22 140-187ng/mL (Q3)      - - CCL22 187-15.8ng/mL (Q4)
